# Supplementary material for: Competition mechanism of self-trapped excitons and Te4+ ions emission in the Te4+ doped vacancy-ordered double perovskite Rb2HfCl6 and its excellent properties
Source: Royal Society of Chemistry journal article supplement (doi:10.1039/d4qi00109e), 2024-01-01
Supplement: d4qi00109e1.pdf [file d4qi00109e1.pdf]

# **Competition mechanism of self-trapped excitons and $\text{Te}^{4+}$ ions emission in $\text{Te}^{4+}$ doped vacancy-ordered double perovskite $\text{Rb}_2\text{HfCl}_6$ and its excellent property**

Ruxin Liu <sup>a</sup>, Kaishun Zou<sup>b</sup>, Guanglu Zhang <sup>a</sup>, Min Feng<sup>c</sup>, Mingxuan Li<sup>a</sup>, Juncheng Liu <sup>a</sup>

<sup>a</sup> School of Materials Science and Engineering, Tiangong University, Tianjin, 300387, China.

<sup>b</sup> School of Physical Science and Technology, Tiangong University, Tianjin, 300387, China.

<sup>c</sup> School of Physics, Nankai University, Tianjin, 300071, China

\* Corresponding author, Prof., Email: jchliu@tiangong.edu.cn

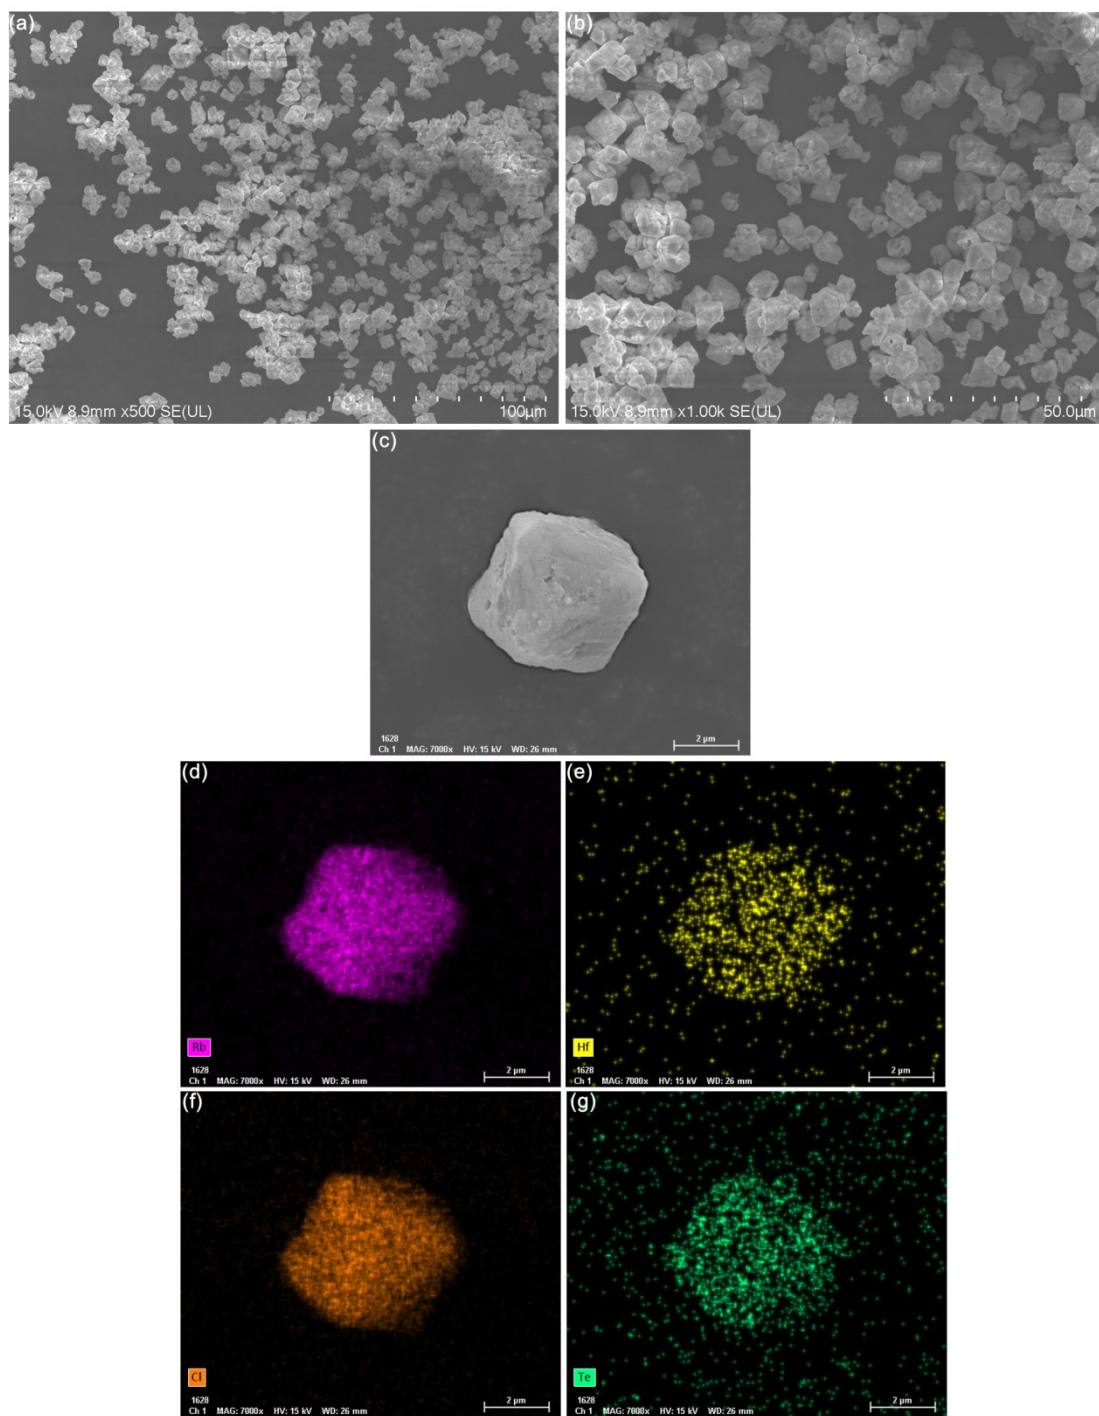

**Figure S1.** (a,b) SEM images of  $\text{Rb}_2\text{HfCl}_6$ : 3% $\text{Te}^{4+}$ VODP; (c-g) EDS element mapping image for  $\text{Rb}_2\text{HfCl}_6$ : 3%  $\text{Te}^{4+}$ .

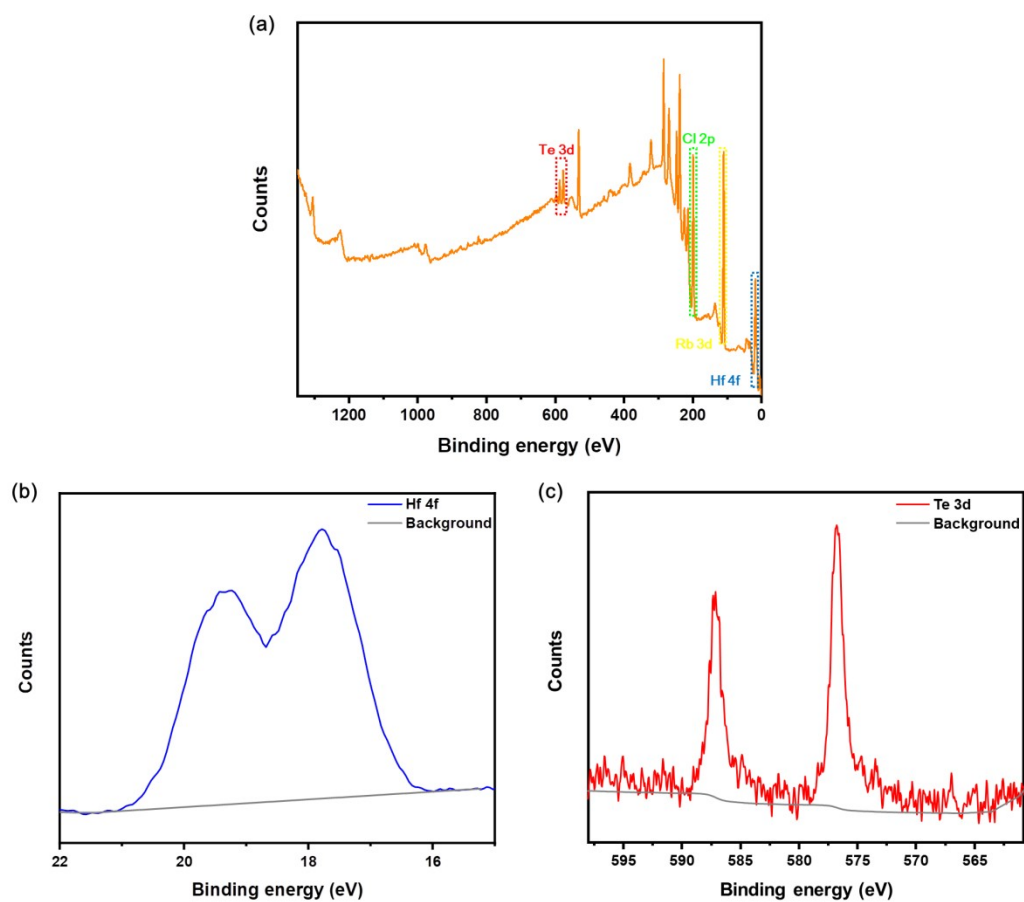

**Figure S2.** (a) XPS spectrum of  $\text{Rb}_2\text{HfCl}_6: 3\%\text{Te}^{4+}\text{VODP}$ ; High resolution XPS spectrum of (b)  $\text{Hf } 4f$  and (c)  $\text{Te } 3d$ .

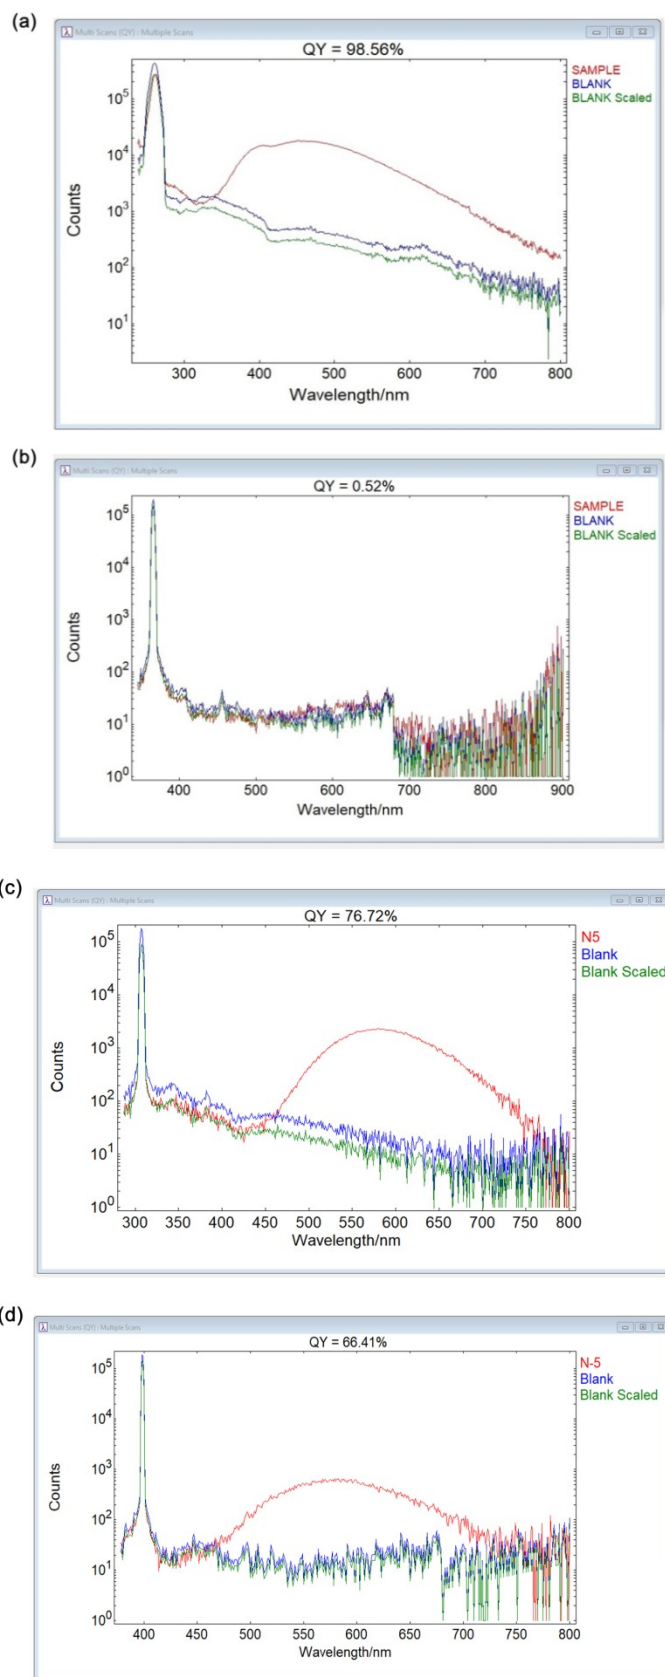

**Figure S3.** PLQY measurements of (a)  $\text{Rb}_2\text{HfCl}_6$  and (b)  $\text{Rb}_2\text{TeCl}_6$ ; PLQY measurement of  $\text{Rb}_2\text{HfCl}_6$ : 3% $\text{Te}^{4+}$  at excitation wavelengths of (c)  $\lambda_{\text{ex}} = 306$  nm and (d)  $\lambda_{\text{ex}} = 398$  nm.

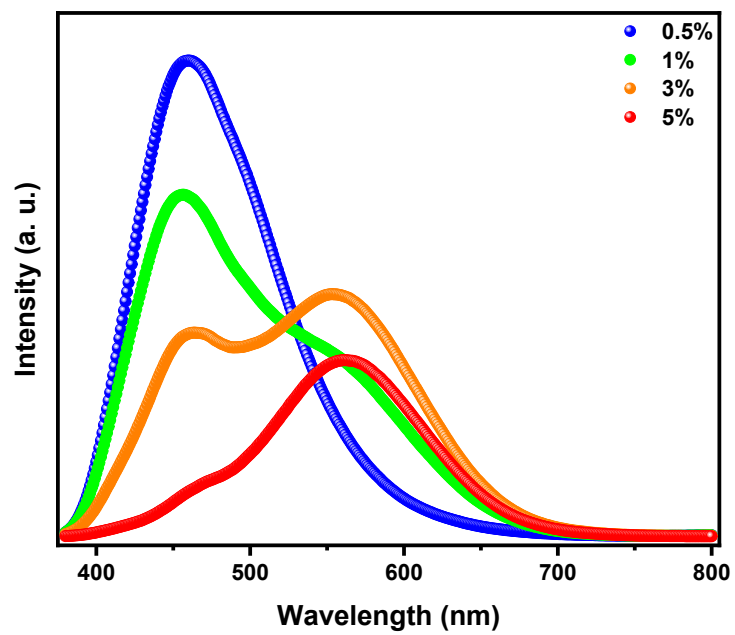

**Figure S4.** PL spectra of  $\text{Rb}_2\text{HfCl}_6$ :  $x\%\text{Te}^{4+}$  excited by 251 nm ( $x=0.5, 1, 3$ , and  $5$ ).

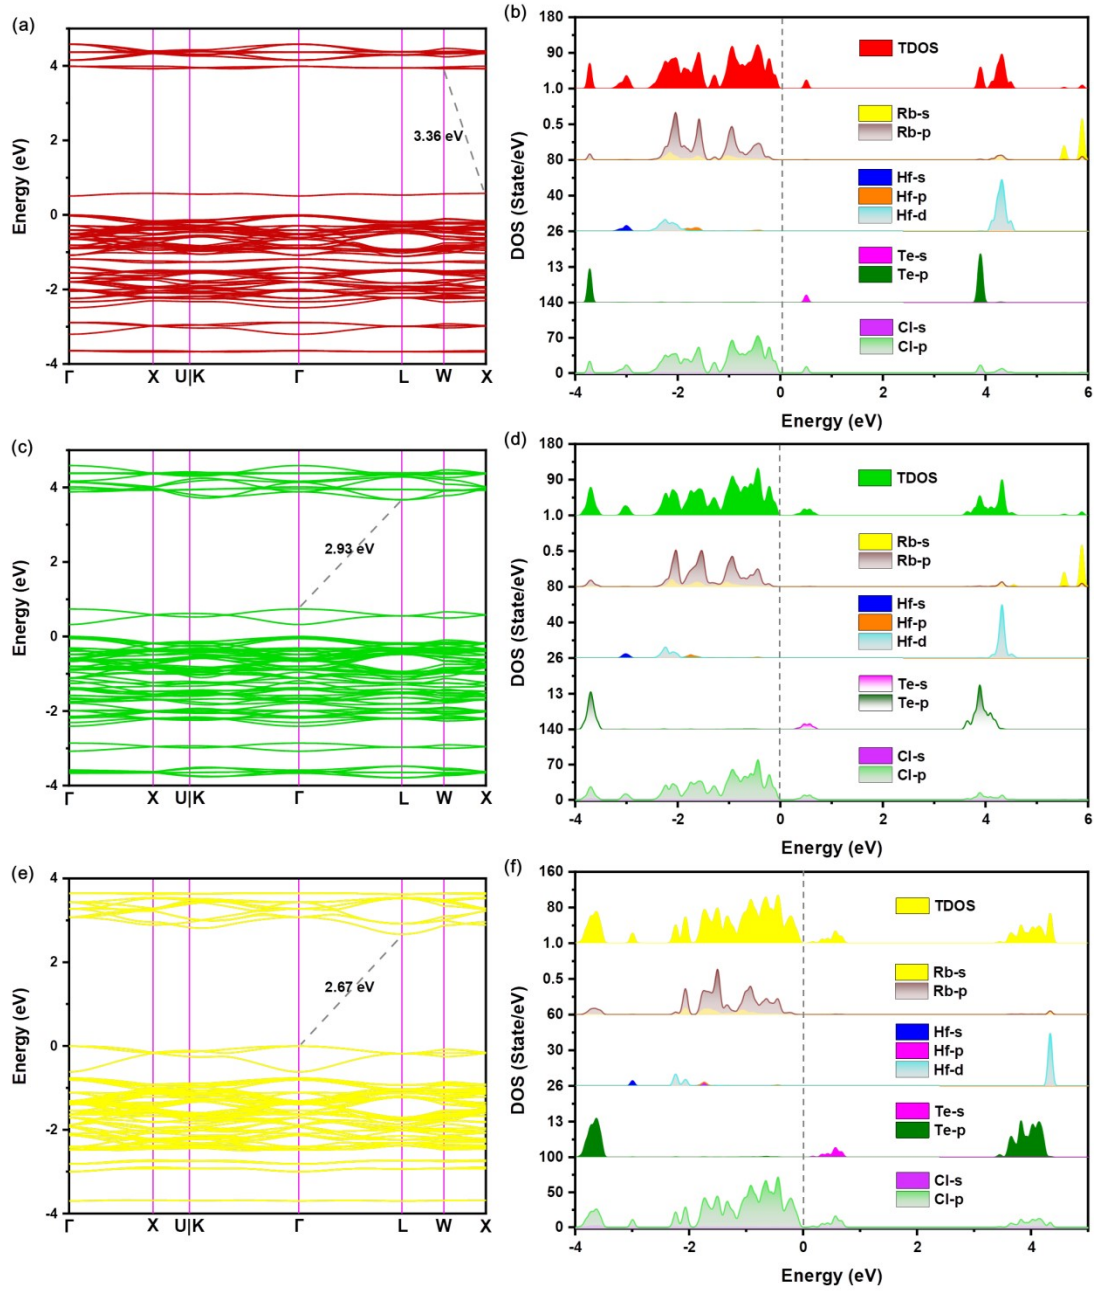

**Figure S5.** (a) Electronic band structure and (b) DOS of  $\text{Rb}_2\text{HfCl}_6$ : 25% $\text{Te}^{4+}$ ; (c) Electronic band structure and (d) DOS of  $\text{Rb}_2\text{HfCl}_6$ : 50% $\text{Te}^{4+}$ ; (e) Electronic band structure and (f) DOS of  $\text{Rb}_2\text{HfCl}_6$ : 75% $\text{Te}^{4+}$ .

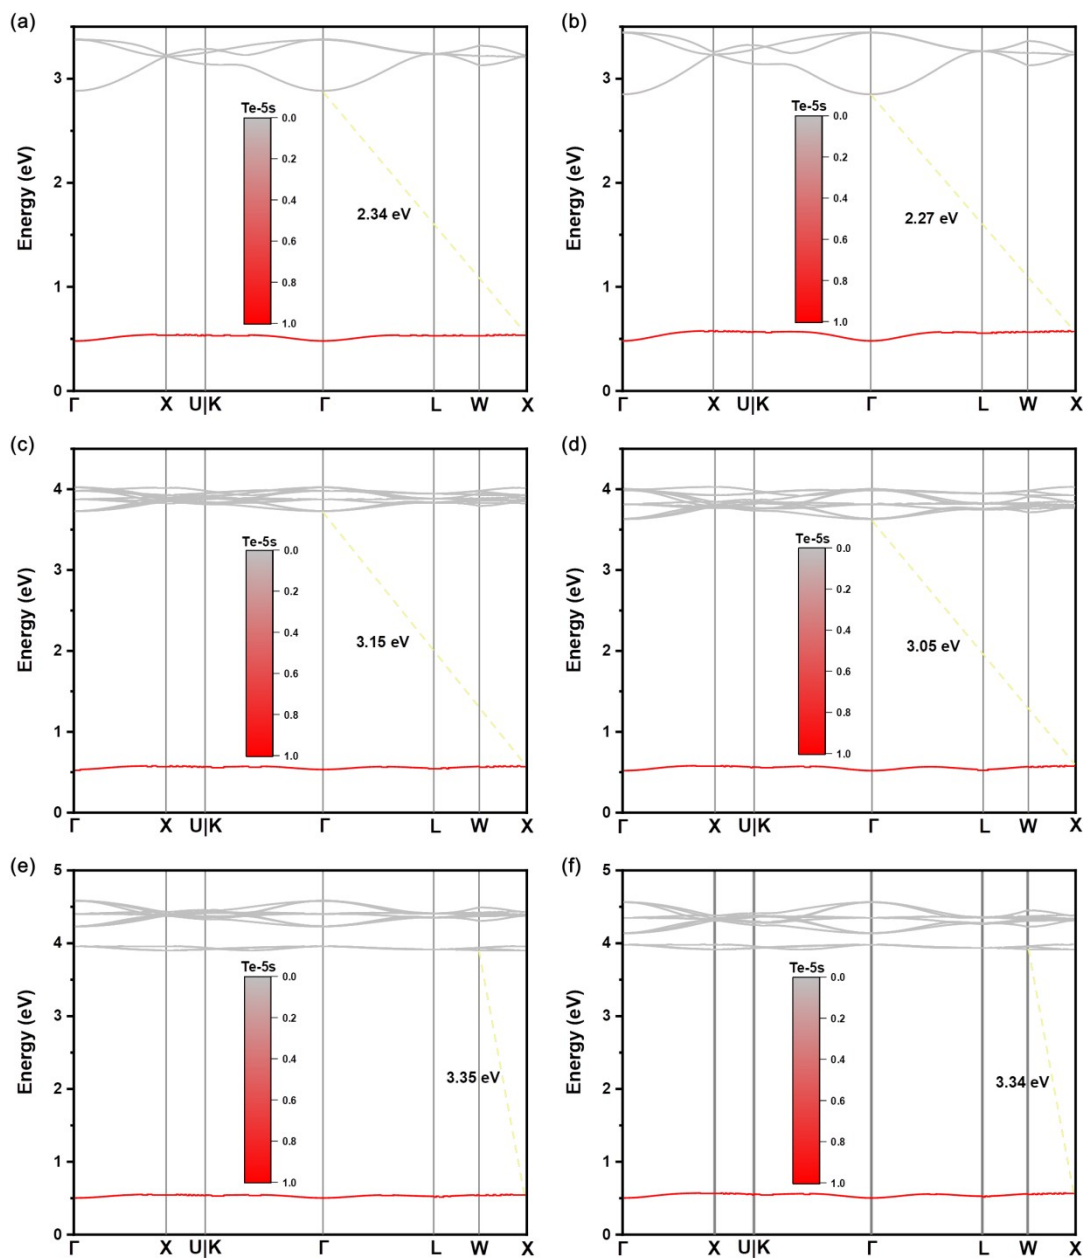

**Figure S6.** Te-5s orbital projection energy bands of Te-doped (a)  $\text{Cs}_2\text{SnCl}_6$ , (b)  $\text{Rb}_2\text{SnCl}_6$ , (c)  $\text{Cs}_2\text{ZrCl}_6$ , (d)  $\text{Rb}_2\text{ZrCl}_6$ , (e)  $\text{Cs}_2\text{HfCl}_6$  and (f)  $\text{Rb}_2\text{HfCl}_6$ .

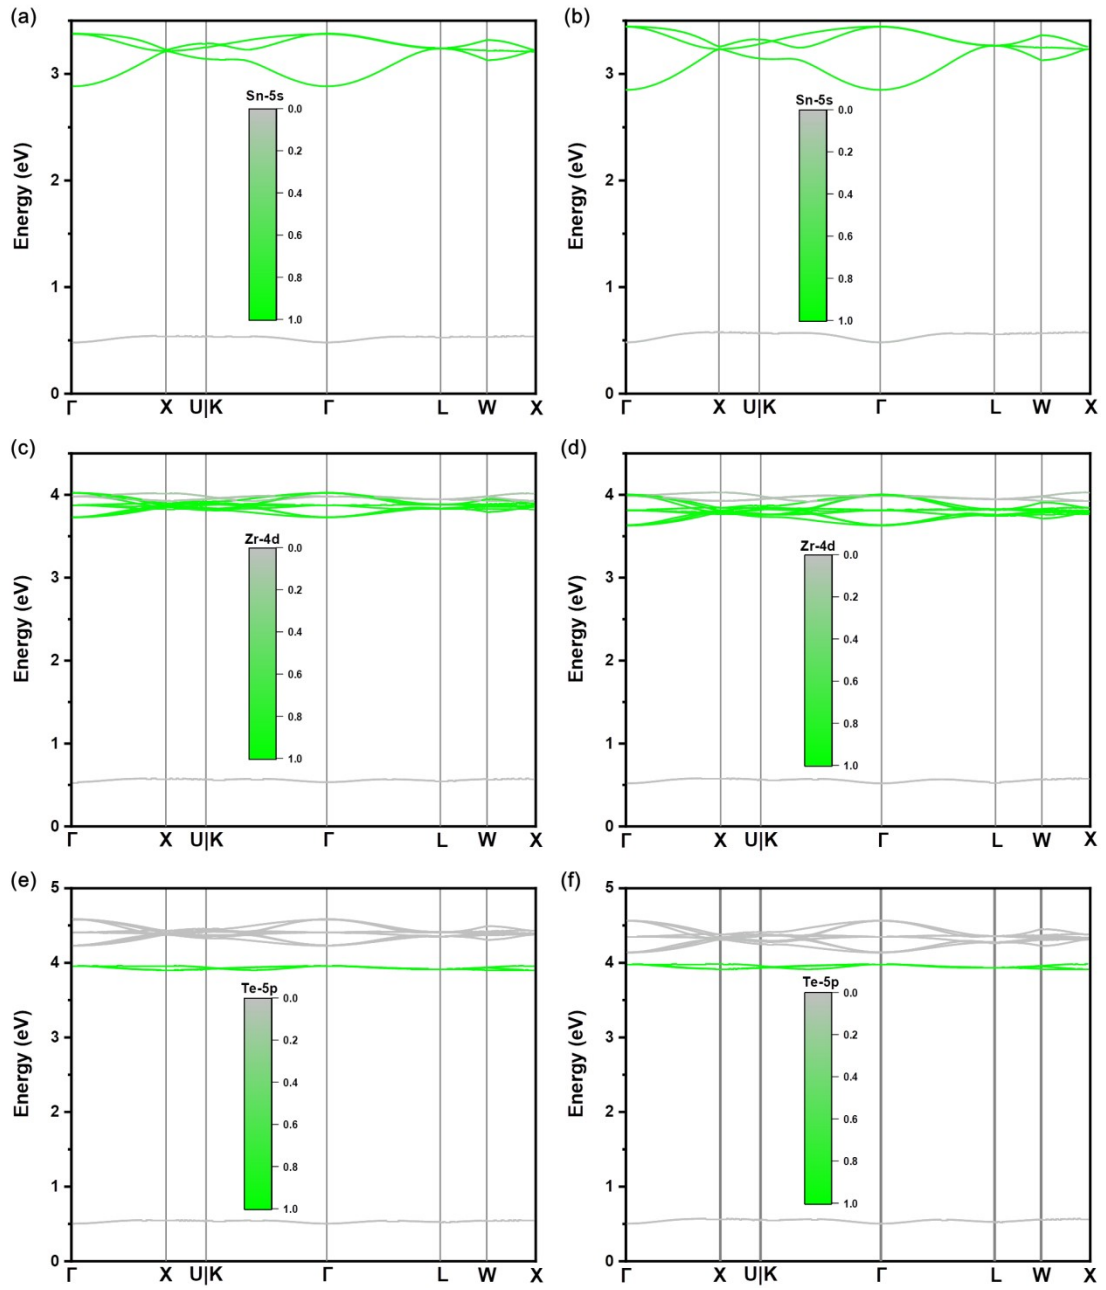

**Figure S7.** Sn-5s orbital projection energy bands of Te-doped (a)  $\text{Cs}_2\text{SnCl}_6$  and (b)  $\text{Rb}_2\text{SnCl}_6$ ; Zr-4d orbital projection energy bands of Te-doped (c)  $\text{Cs}_2\text{ZrCl}_6$  and (d)  $\text{Rb}_2\text{ZrCl}_6$ ; Te-5p orbital projection energy bands of Te-doped (e)  $\text{Cs}_2\text{HfCl}_6$  and (f)  $\text{Rb}_2\text{HfCl}_6$ .



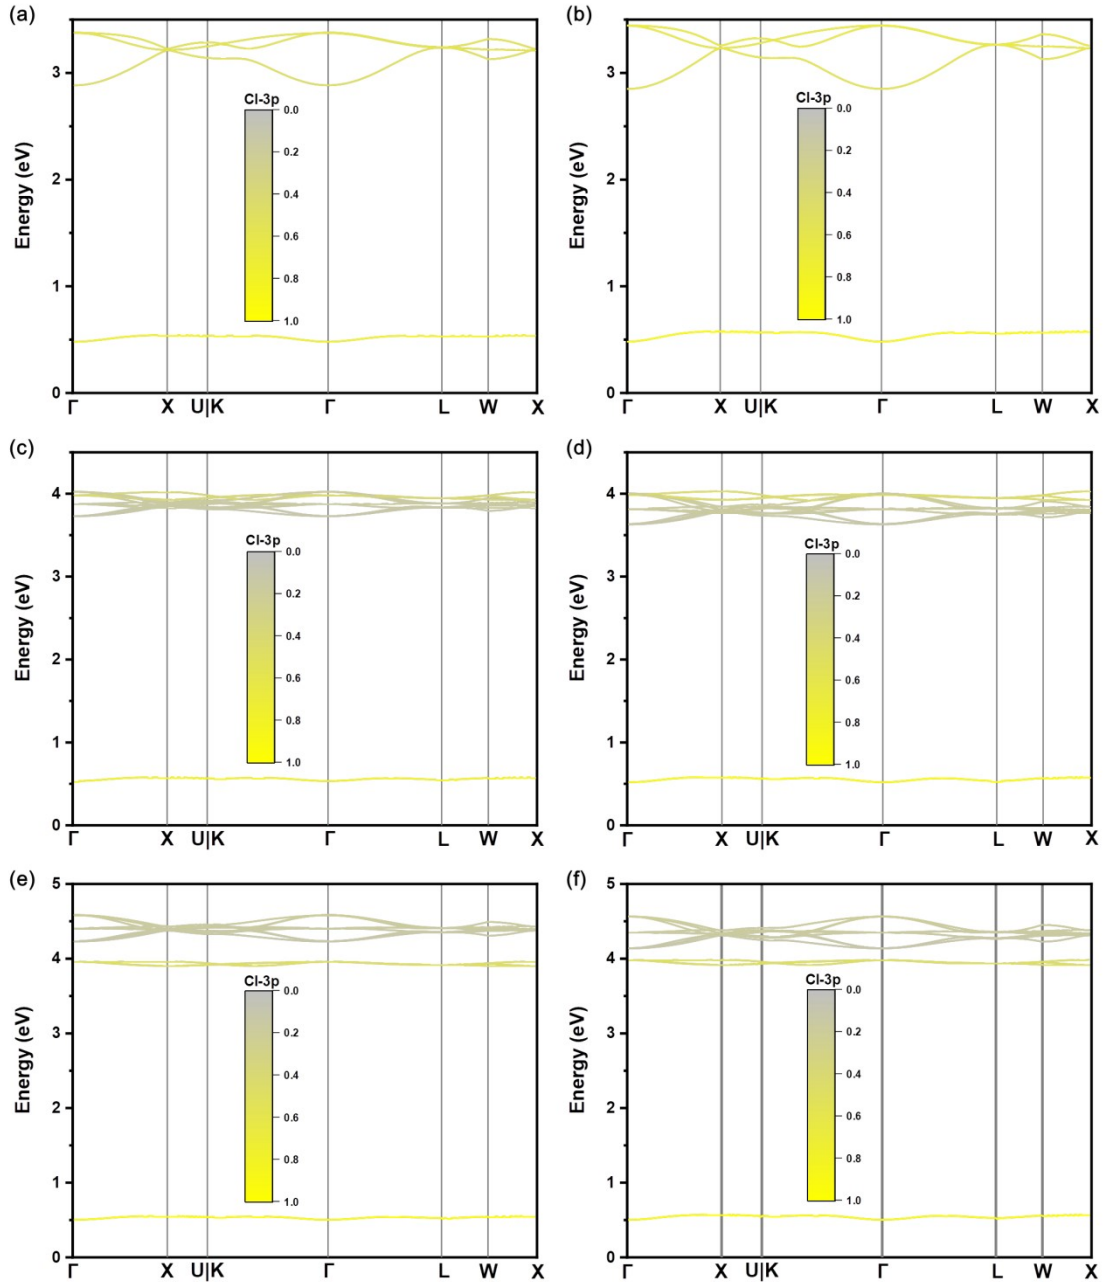

**Figure S8.** Cl-3p orbital projection energy bands of Te-doped (a)  $\text{Cs}_2\text{SnCl}_6$ , (b)  $\text{Rb}_2\text{SnCl}_6$ , (c)  $\text{Cs}_2\text{ZrCl}_6$ , (d)  $\text{Rb}_2\text{ZrCl}_6$ , (e)  $\text{Cs}_2\text{HfCl}_6$  and (f)  $\text{Rb}_2\text{HfCl}_6$ .

**Table S1.** The feed ratio of  $\text{Rb}_2\text{HfCl}_6$ :  $x\%\text{Te}^{4+}$  and ICP-OES results.

| Feed ratio | ICP-OES results |
|------------|-----------------|
| 3%         | 1.27%           |
| 10%        | 6.74%           |
| 25%        | 19.23%          |
| 50%        | 45.08%          |
| 75%        | 71.61%          |
